# Supplementary material
Source: PubMed Central journal article supplement (PMC7129786)
Supplement: mmc1.pdf [file mmc1.pdf]

# Supplementary Figure 1

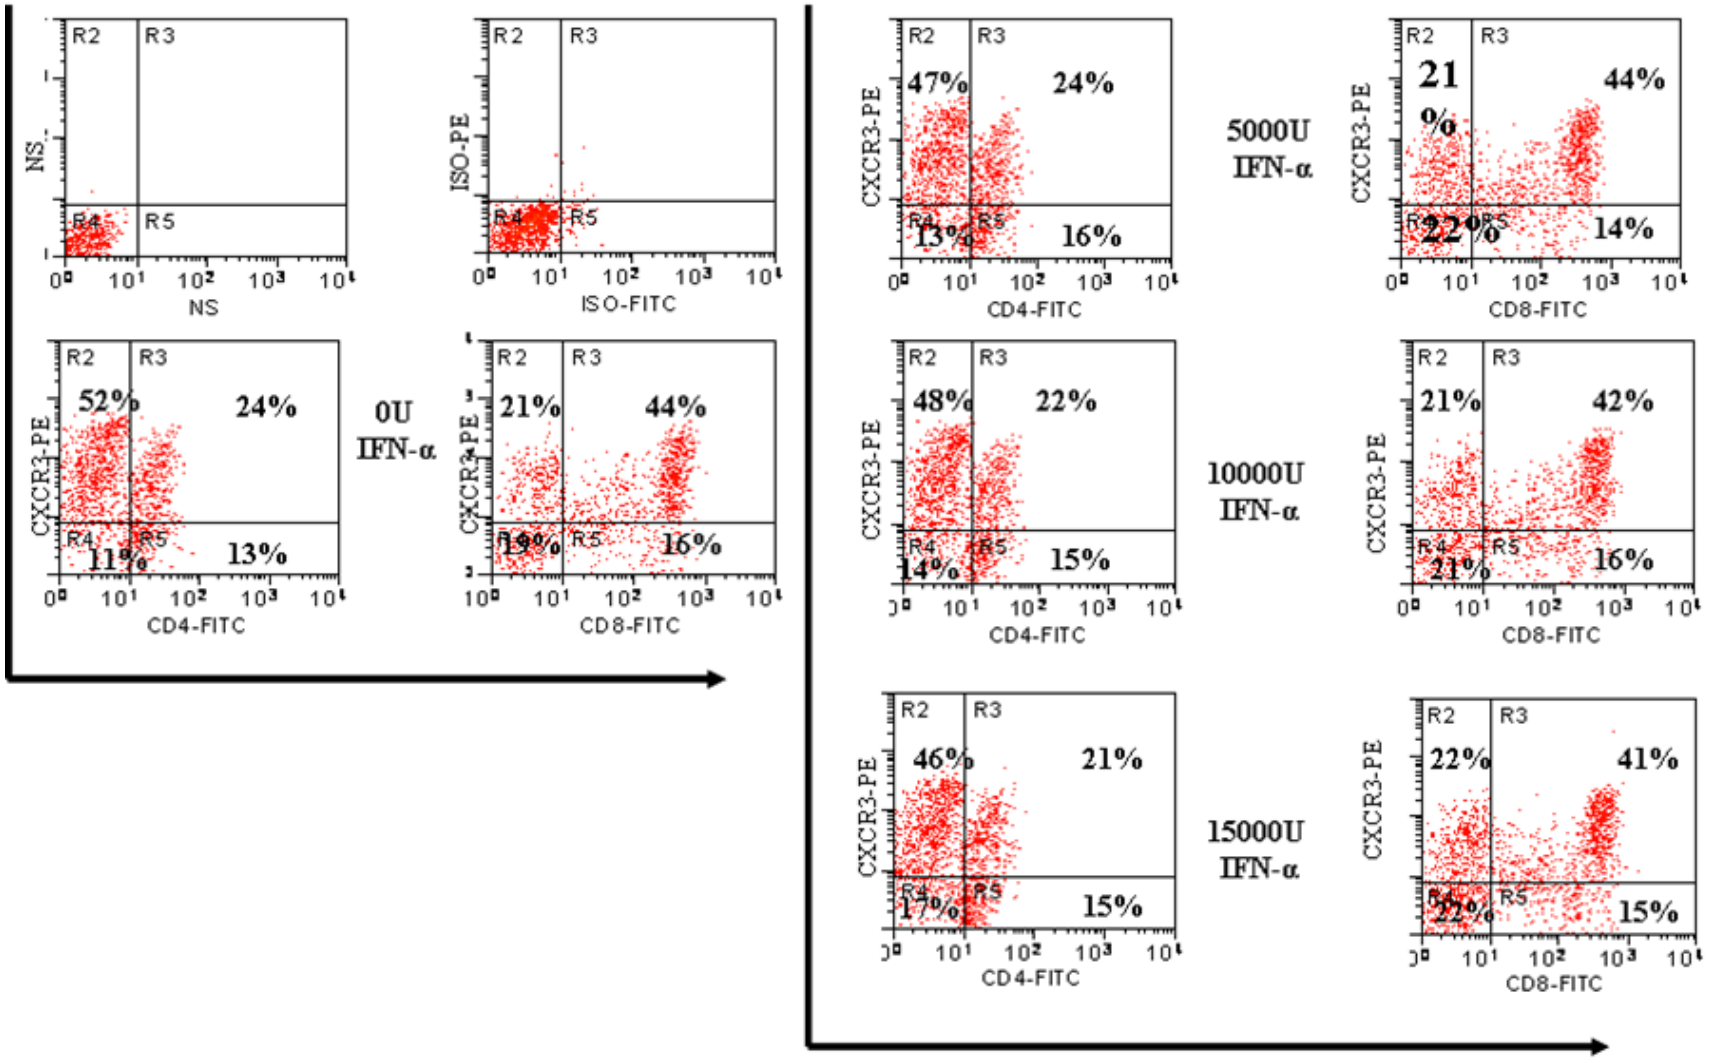

**Supplementary Figure 1. CXCR3 expression is not induced by IFN $\alpha$  stimulation of T cells.** Freshly isolated human T cells were cultured in medium alone or with medium containing different concentrations of recombinant IFN $\alpha$  as indicated for 24 hours. The cells then were washed and double stained with mouse monoclonal anti-human CD4, CD8-FITC or CXCR3-PE, and analyzed by FACS. FACS results are shown for events in the live cell gate. The results are representative of three independent experiments.

# Supplementary Figure 2

A

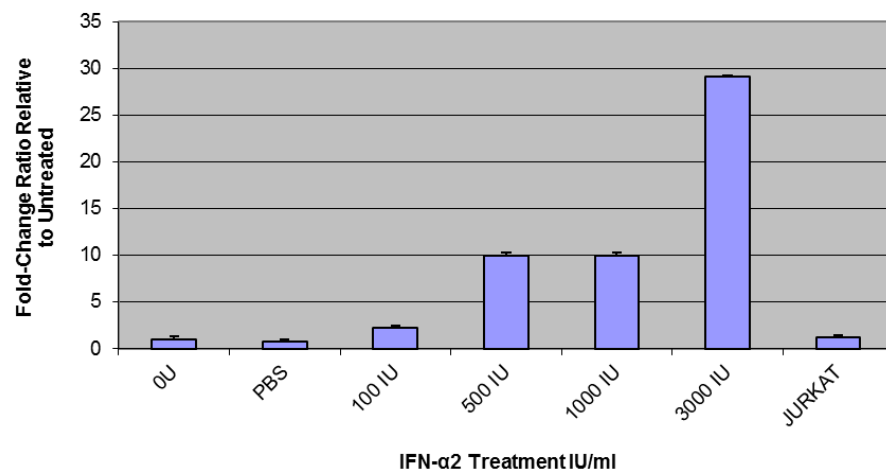

B

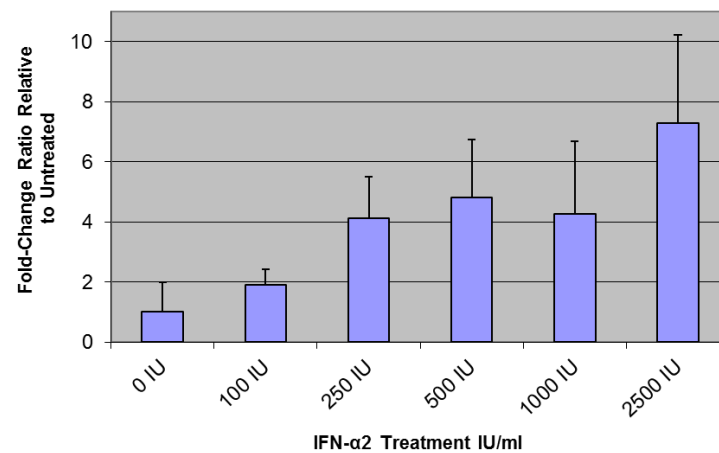

**Supplementary Figure 2. CXCL10 expression is increased in response to IFNα2 treatment both in primary lymphocytes (A) and HEK293 cells (B).** Primary lymphocytes and HEK293 cells were simulated with various doses of IFNα2 as indicated. CXCL10 mRNA measured by real-time PCR following Expression profiles were affected significantly by IFNα2.

## Supplementary Figure 3

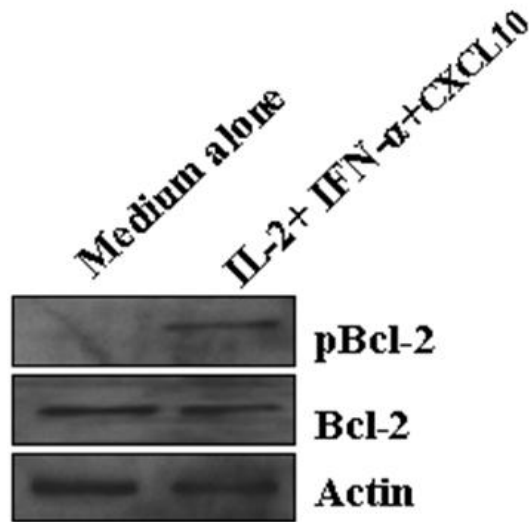

**Supplementary Figure 3. CXCL10 induces phosphorylation of Bcl2 in T lymphocytes.** Human T cells were cultured in medium alone or treated with IL-2, IFN $\alpha$ , and CXCL10, for 16 hours. Cells were then lysed and phosphorylation of Bcl2 was determined by western blot analysis using a specific anti-phospho-Bcl2 antibody. Antibodies that recognize total Bcl2 and actin were used to determine equal loading between samples.
